# Supplementary material
Source: MDPI journal article supplement (https://www.mdpi.com/2410-3888/5/1/2)

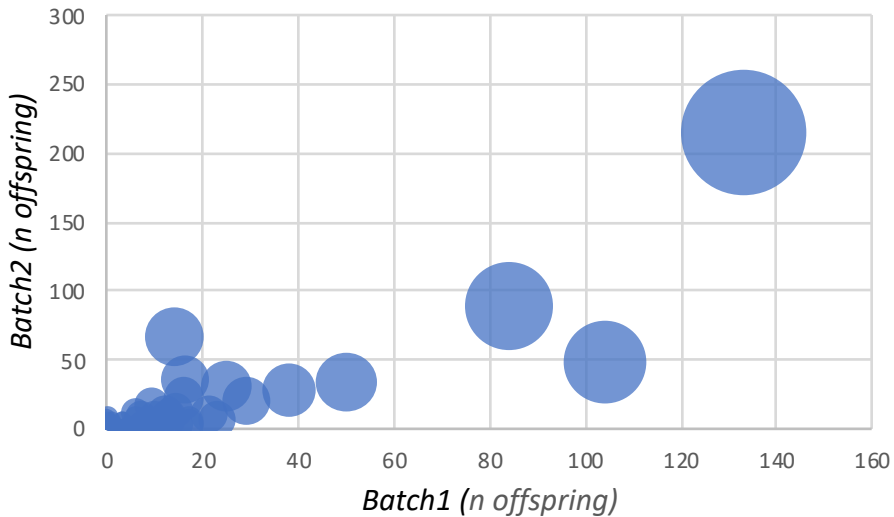

Supplement: s1 [file s1]

## Batch1

2

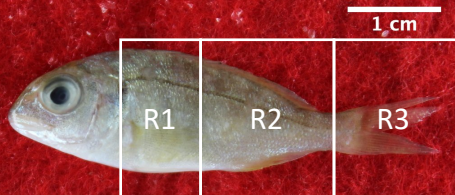

2

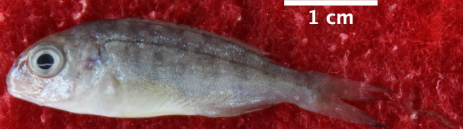

7

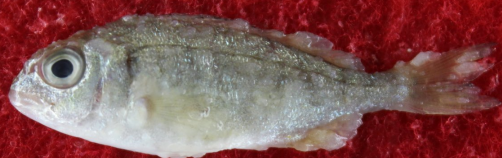

9

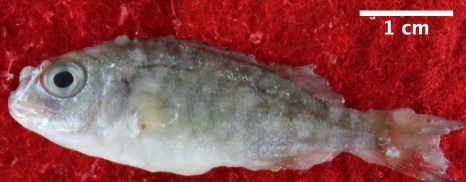

9

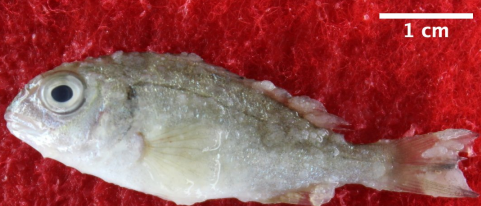

## Batch2

2

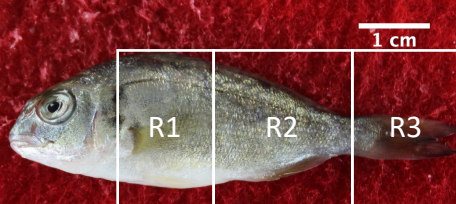

4

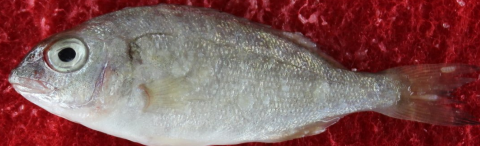

7

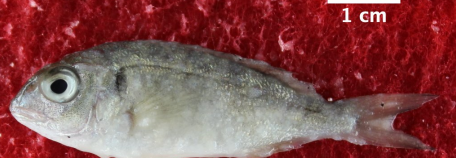

9

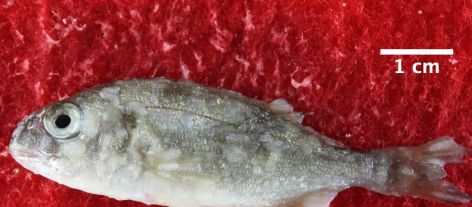

9

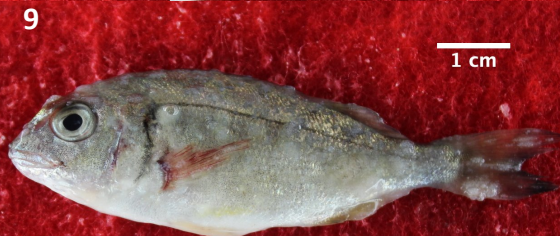

Supplement: s1 [file s1]
